# Supplementary material for: Efficacy and biomarker analysis of nivolumab plus gemcitabine and cisplatin in patients with unresectable or metastatic biliary tract cancers: results from a phase II study
Source: PubMed Central journal article supplement (PMC7269541; doi:10.1136/jitc-2019-000367), 2020-06-02
Supplement: jitc-2019-000367supp002.pdf [file jitc-2019-000367supp002.pdf]

Supplementary Data:

A

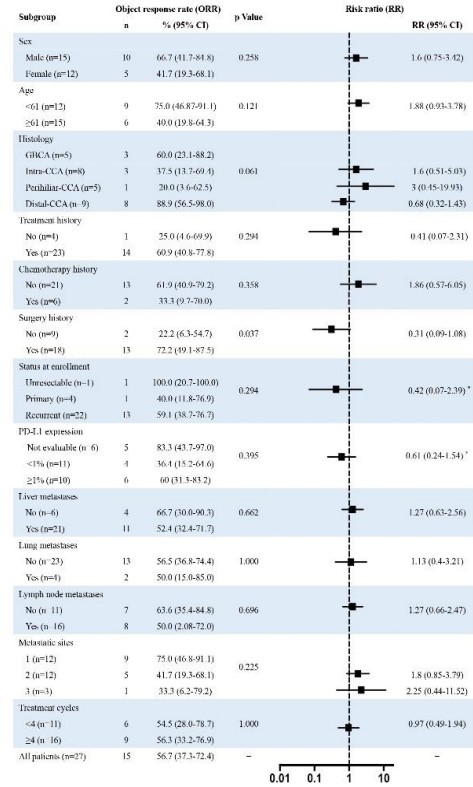

B

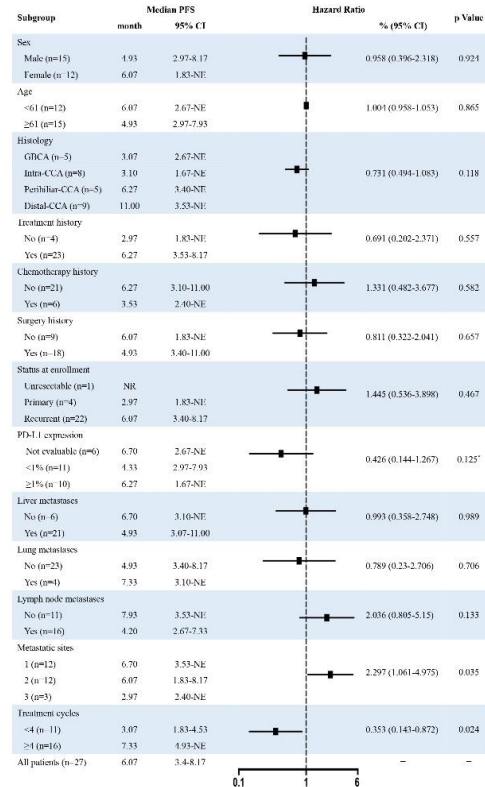

C

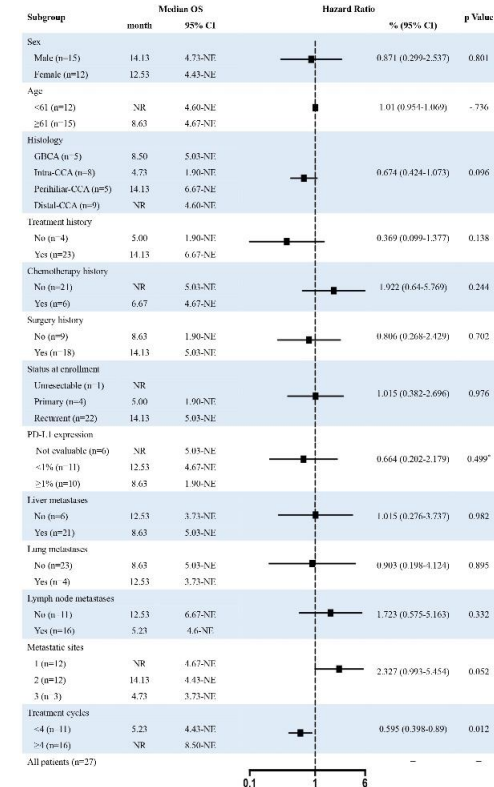

Figure S1: Multivariate analysis of the correlation between different variables and ORR (A), median PFS (B) and median OS (C).

| Sample | MSI  | TMB  | TNB  | Fitness  | Heterogeneity | Group      |
|--------|------|------|------|----------|---------------|------------|
| Pt19   | 2.13 | 2.85 | 1.39 | -15.789  | NA            | Respond    |
| Pt30   | 1.82 | 2.96 | 1.12 | -16.6964 | 0.2           | Respond    |
| Pt13   | 0.1  | 1.33 | 0.65 | -4.37534 | 0.84          | NonRespond |
| Pt4    | 2.67 | 4.65 | 2.03 | -8.96791 | 0             | Respond    |
| Pt17   | 0.74 | 4.5  | 1.5  | -14.869  | 0.16          | NonRespond |
| Pt27   | 2.76 | 6.83 | 4.07 | -7.33157 | 0.13          | NA         |
| Pt25   | 1.61 | 2.56 | 1.37 | -2.16677 | 0.32          | NonRespond |
| Pt8    | 0.7  | 3.24 | 1.36 | -3.42382 | NA            | NonRespond |
| Pt24   | 0.71 | 0.94 | 0.25 | -1.7125  | NA            | NonRespond |
| Pt10   | 3.12 | 0.87 | 0.52 | -0.47016 | 0.28          | NA         |
| Pt6    | 0.71 | 1.91 | 0.5  | -2.01753 | 0.47          | NonRespond |
| Pt16   | 2.11 | 1.87 | 0.87 | -11.7561 | 0.98          | NA         |
| Pt20   | 2.07 | 1.46 | 0.94 | -6.9884  | 0.82          | NonRespond |
| Pt31   | 1.19 | 3.37 | 1.63 | -7.1236  | NA            | Respond    |
| Pt28   | 1.43 | 1.63 | 0.53 | -14.8748 | 0.25          | Respond    |
| Pt14   | 2.11 | 6.28 | 2.24 | -1.47346 | 0.97          | Respond    |
| Pt7    | 2.82 | 4.46 | 2.26 | -1.97912 | 0.3           | NonRespond |
| Pt23   | 1.39 | 1.39 | 0.97 | -13.5947 | NA            | Respond    |
| Pt18   | 1.29 | 1.3  | 0.68 | -5.94804 | 0.4           | NonRespond |
| Pt2    | 2.1  | 2.94 | 1.23 | -2.39602 | 0.12          | Respond    |

**Figure S2:** Data of whole-exome sequencing.

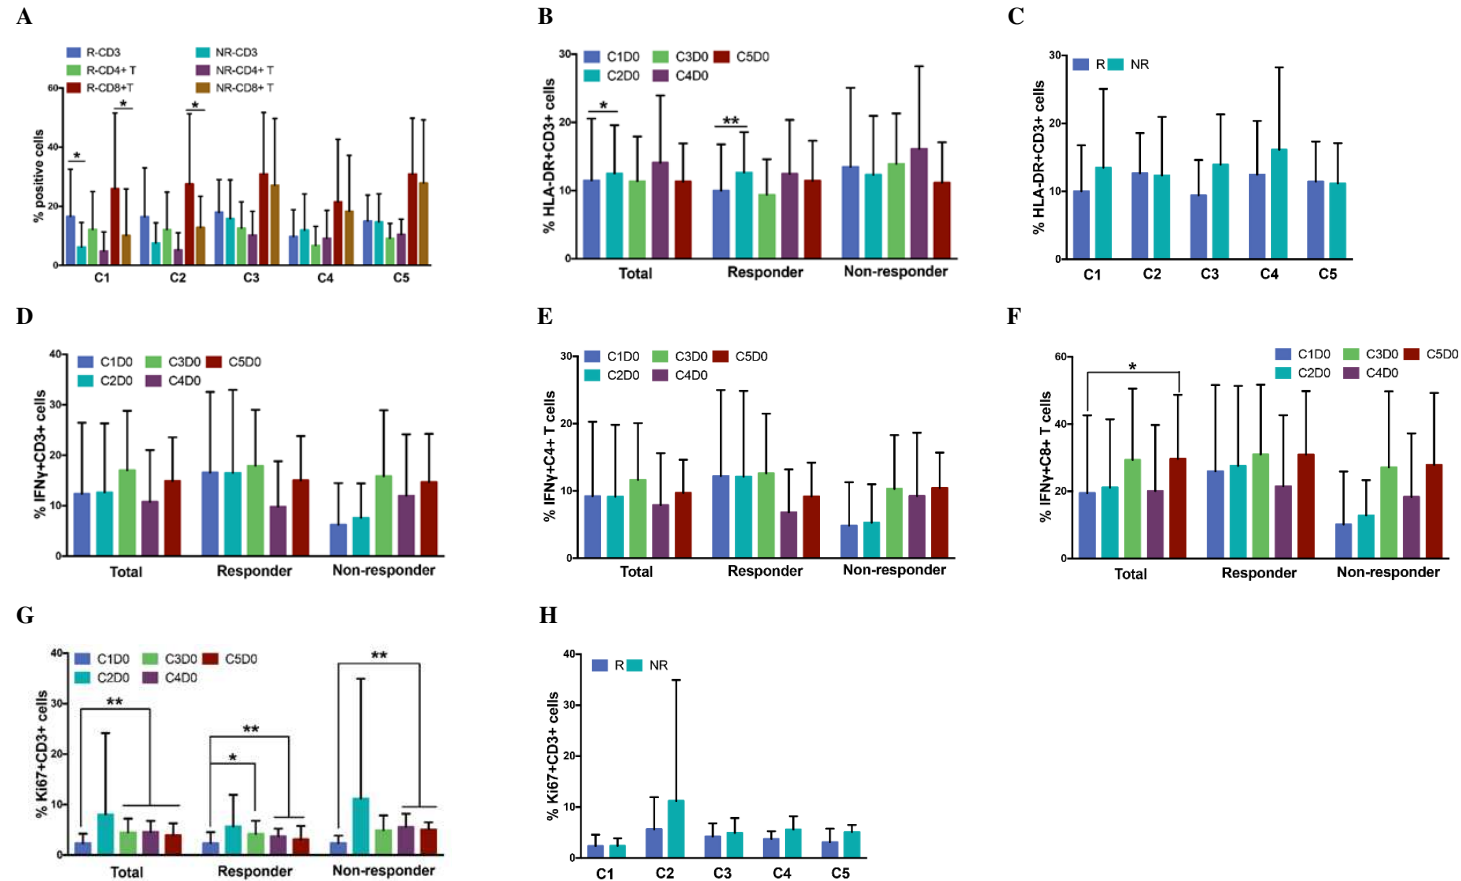

**Figure S3:** Analysis of the association between clinical antitumor activity and the activation of peripheral T cells.

\* :  $P \leq 0.05$ . \* \* :  $P \leq 0.01$ . R = responder. NR = non-responder.

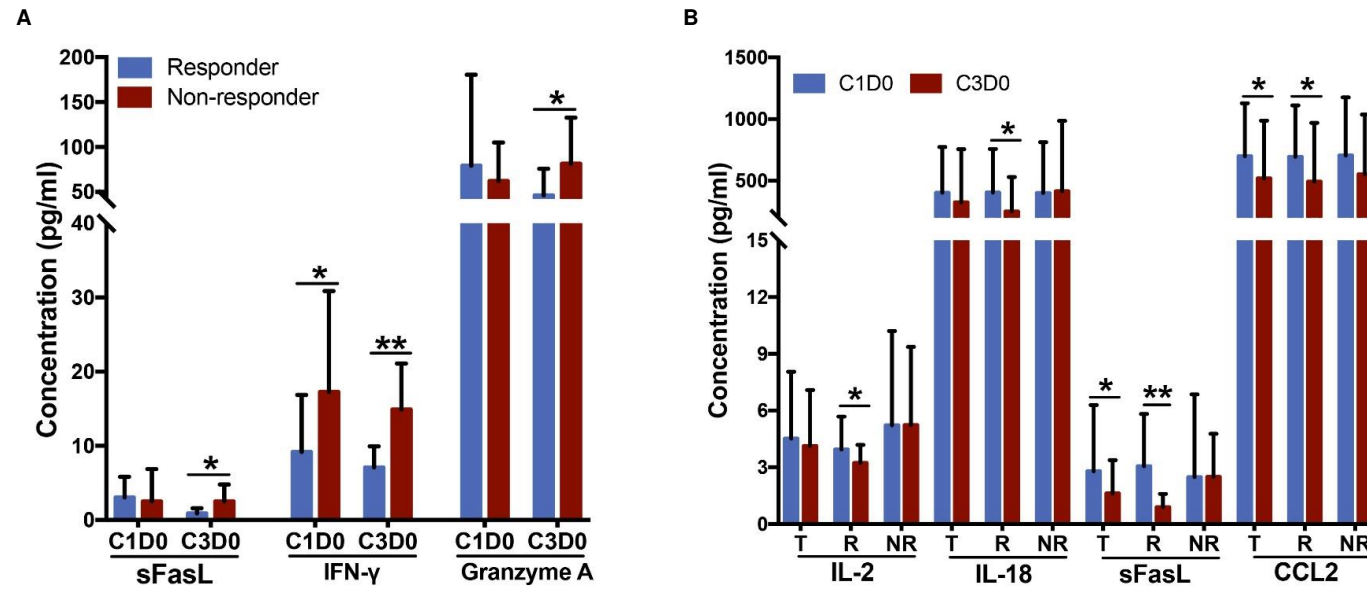

**Figure S4:** Analysis of the association between clinical antitumor activity and the concentration of serum cytokines and chemokines

\* :  $P \leq 0.05$ . \* \* :  $P \leq 0.01$ . T = total. R = responder. NR = non-responder.

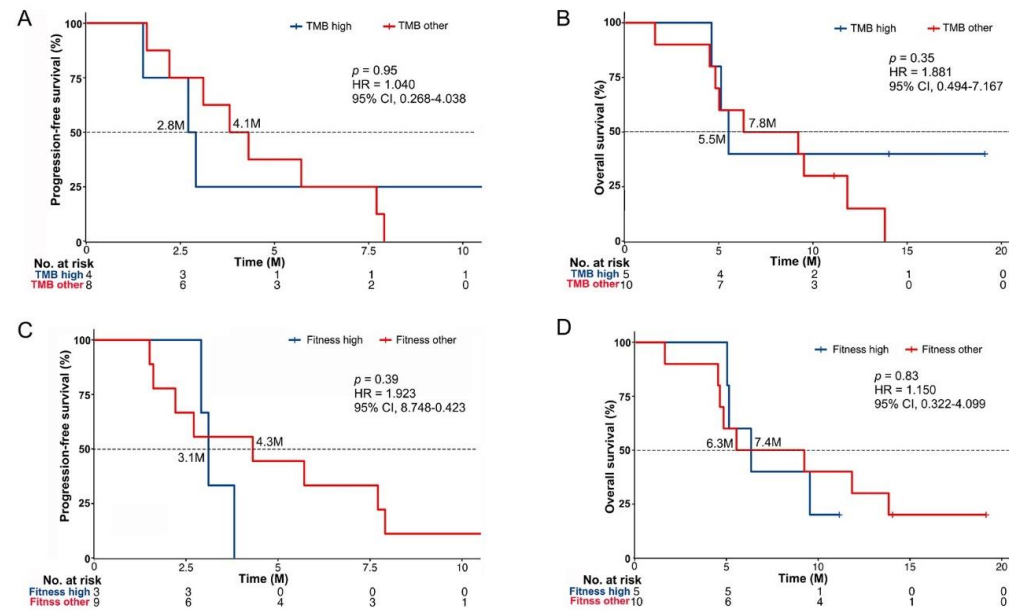

**Figure S5:** A. Kaplan-Meier curves of progression free survival of patients with high TMB and other levels of TMB. B. Kaplan-Meier curves of overall survival of patients with high TMB and other levels of TMB. C. Kaplan-Meier curves of progression free survival of patients with high fitness and other levels of fitness. D. Kaplan-Meier curves of overall survival of patients with high fitness and other levels of fitness.

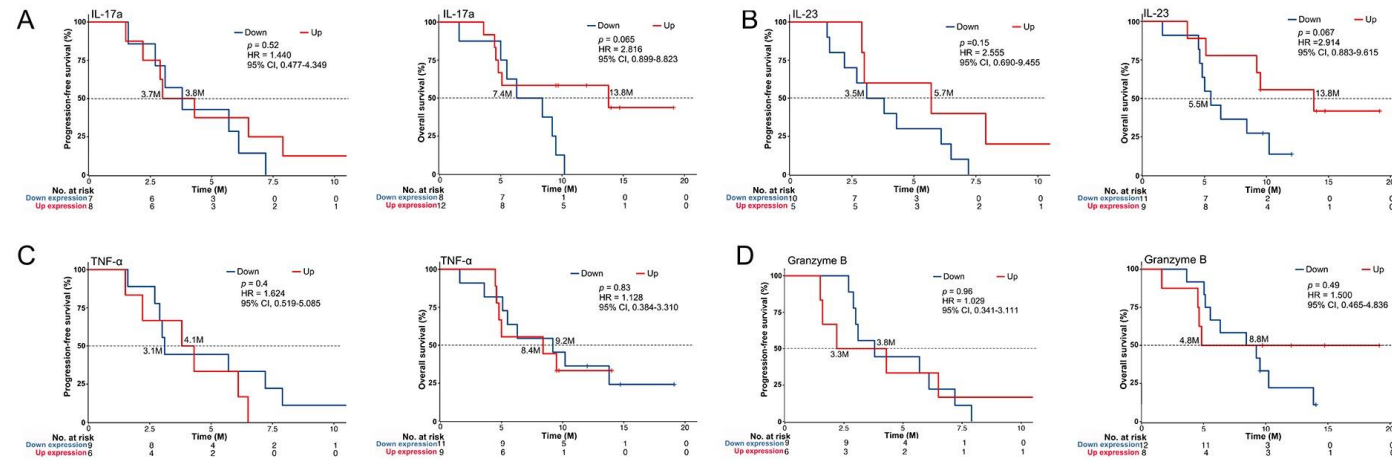

**Figure S6:** Analysis of correlation between serum IL-17a (A), IL-23 (B), TNF- $\alpha$  (C) and Granzyme B (D) and progression free survival and overall survival.

Figure S7

Patient 1 with SD

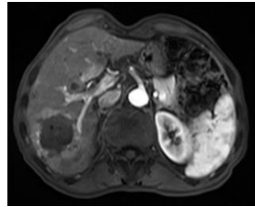

Baseline

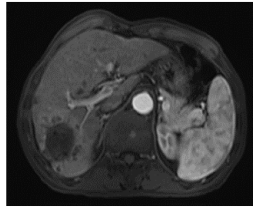

4-cycle after treatment

Patient 2 with PR

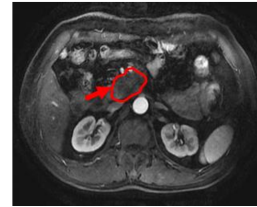

Baseline

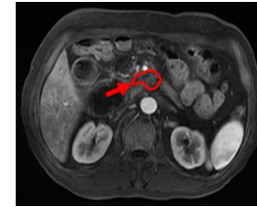

2-cycle after treatment

Patient 4 with CR

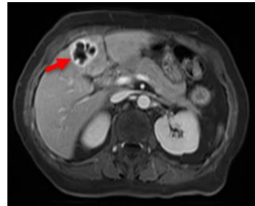

Baseline

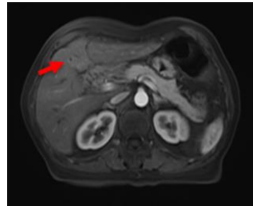

4-cycle after treatment

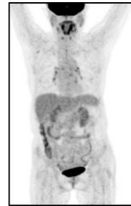

PET/CT confirmation

Patient 5 with PR

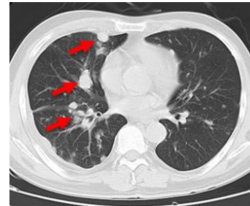

Baseline

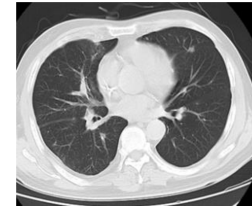

2-cycle after treatment

**Patient 6 with SD**

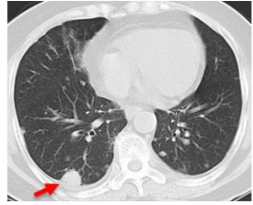

Baseline

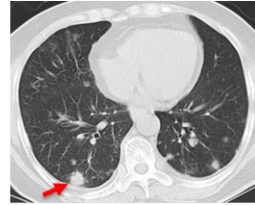

6-cycle after treatment

**Patient 7 with SD**

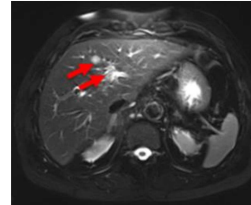

Baseline

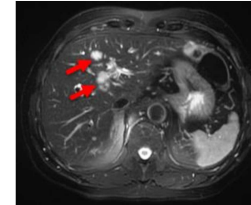

4-cycle after treatment

**Patient 8 with PD**

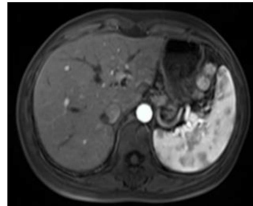

Baseline

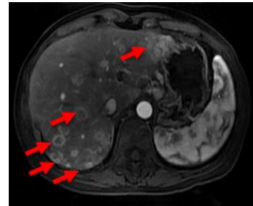

2-cycle after treatment

**Patient 9 with PR**

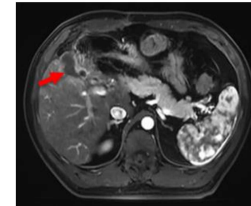

Baseline

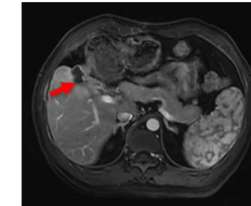

2-cycle after treatment

**Patient 11 with SD**

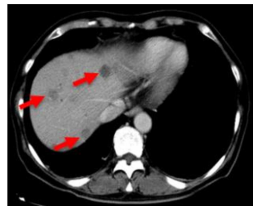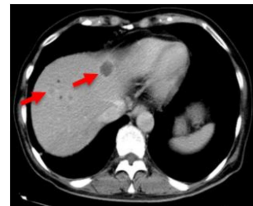

**Patient 12 with CR**

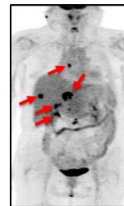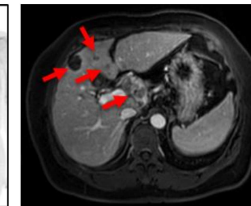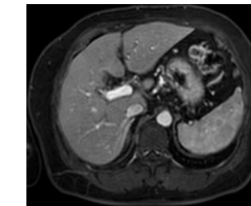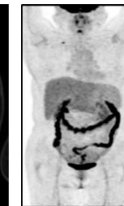



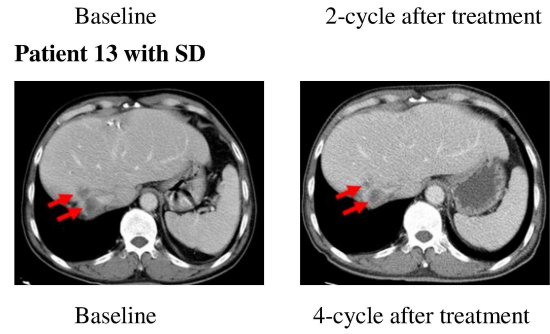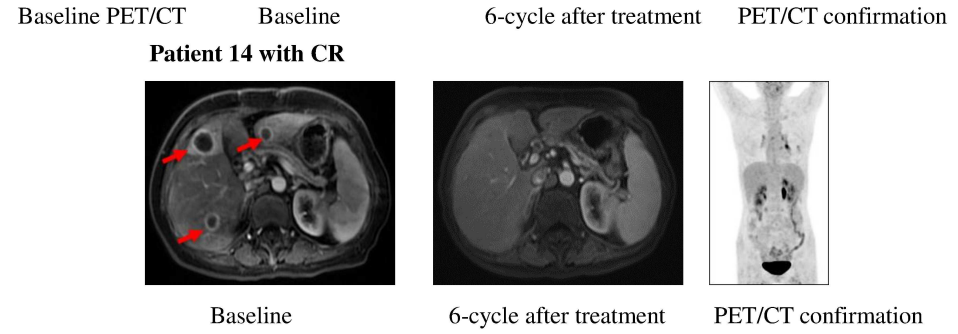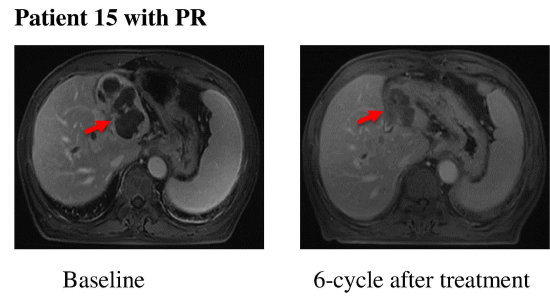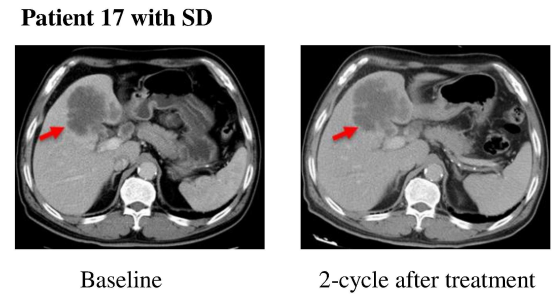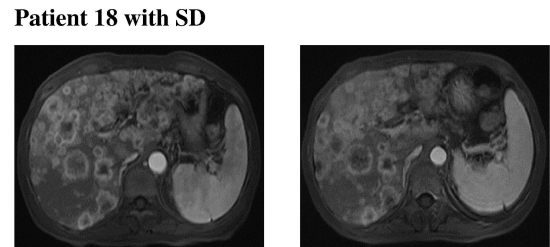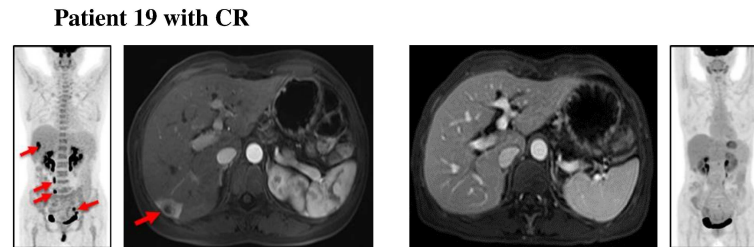

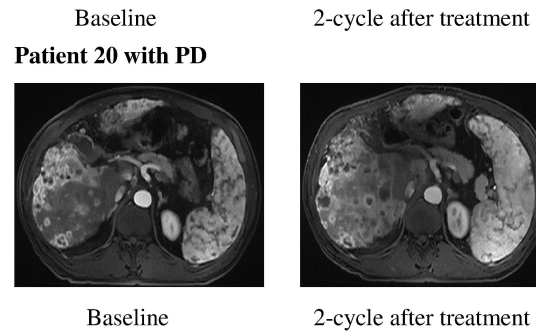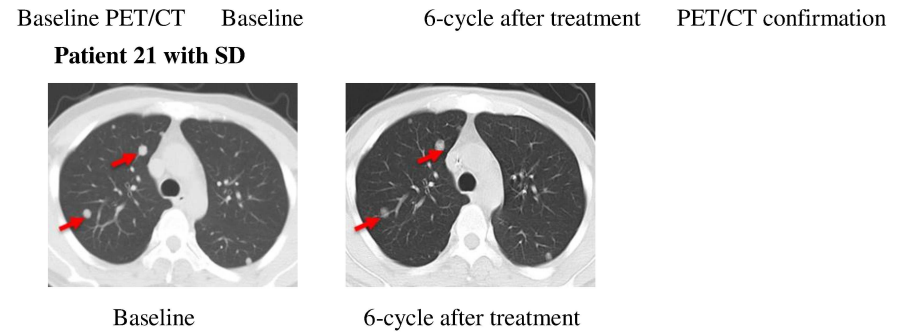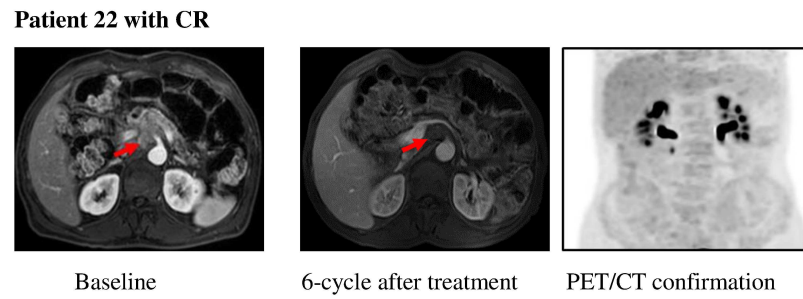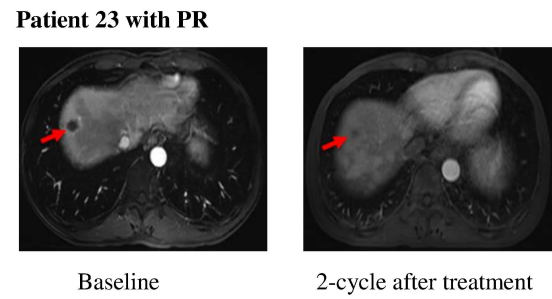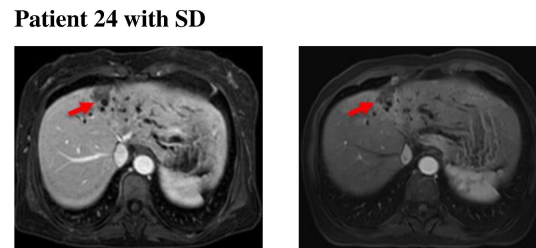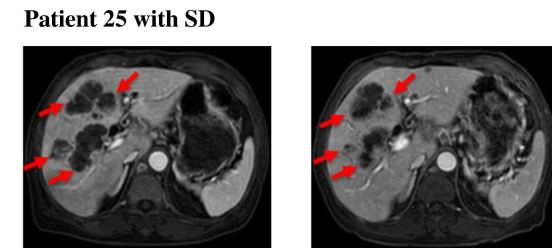

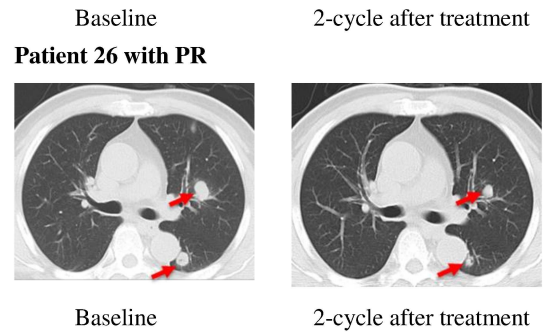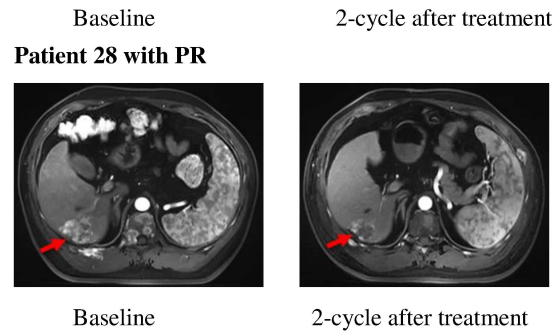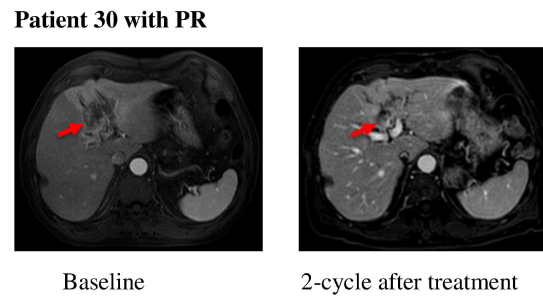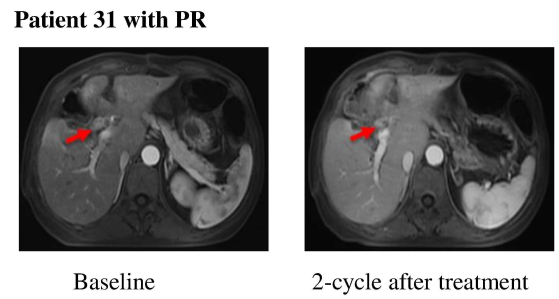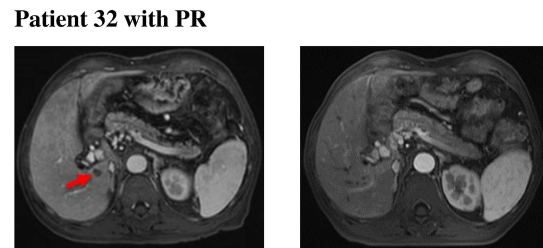

Baseline

2-cycle after treatment
